# Supplementary material for: Tensor decomposition-based unsupervised feature extraction applied to matrix products for multi-view data processing
Source: PubMed Central journal article supplement (PMC5571984; doi:10.1371/journal.pone.0183933), 2017-08-25
Supplement: pone.0183933.s001.pdf [file pone.0183933.s001.pdf]

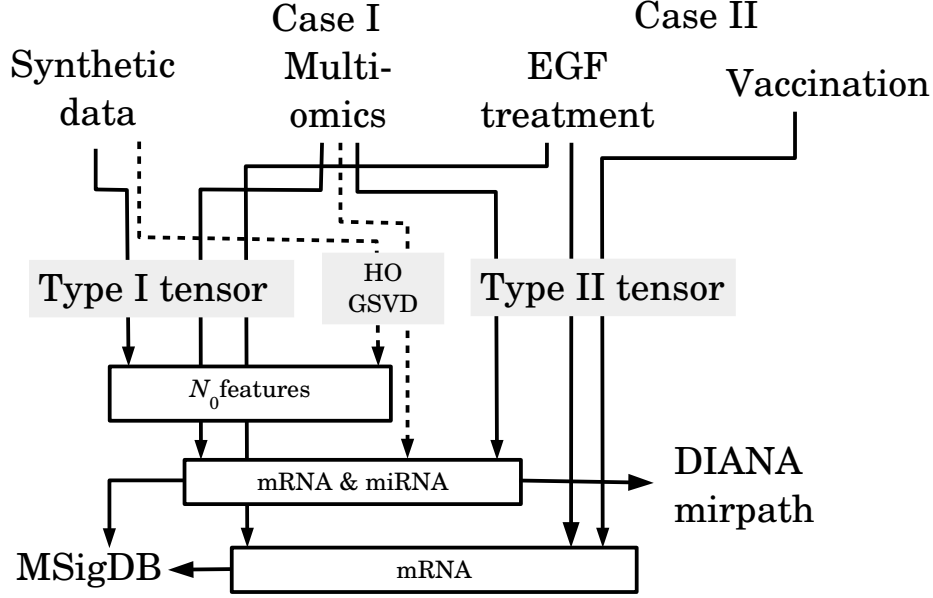

|                            | raw data                                                            | type I tensor                                                                                                                                                                                                                  | type II tensor                                                                                                                                                                                                                                                                                                                                                                                                 |
|----------------------------|---------------------------------------------------------------------|--------------------------------------------------------------------------------------------------------------------------------------------------------------------------------------------------------------------------------|----------------------------------------------------------------------------------------------------------------------------------------------------------------------------------------------------------------------------------------------------------------------------------------------------------------------------------------------------------------------------------------------------------------|
| Synthetic data<br>(case I) | $x_{i_k,j}^{(k)}$                                                   | $x_{i_1,i_2,j}$<br>$x_{\ell_1,i_1}^{(1)}, x_{\ell_2,i_2}^{(2)}, x_{\ell_3,j}$<br>$1 \leq i_1, i_2, \ell_1, \ell_2 \leq N(=1000), 1 \leq j, \ell_3 \leq M(=50)$                                                                 | $\tilde{x}_{i_1,i_2}$<br>$\tilde{x}_{\ell_1,i_1}^{(1)}, \tilde{x}_{\ell_2,i_2}^{(2)}, \tilde{x}_{\ell_3,j}^{(1)}, \tilde{x}_{\ell_3,j}^{(2)}$                                                                                                                                                                                                                                                                  |
| Multi-omics<br>(case I)    | $x_{i_1,j}^{\text{mRNA}}, x_{i_2,j}^{\text{miRNA}}$                 | $x_{i_1,i_2,j}$<br>$x_{\ell_1,i_1}^{\text{mRNA}}, x_{\ell_2,i_2}^{\text{miRNA}}, x_{\ell_3,j}$<br>$1 \leq i_1, \ell_1 \leq 13393, 1 \leq i_2, \ell_2 \leq 755, 1 \leq j, \ell_3 \leq 161$                                      | $\tilde{x}_{i_1,i_2}$<br>$\tilde{x}_{\ell_1,i_1}^{\text{mRNA}}, \tilde{x}_{\ell_2,i_2}^{\text{miRNA}}, \tilde{x}_{\ell_3,j}^{\text{mRNA}}, \tilde{x}_{\ell_3,j}^{\text{miRNA}}$                                                                                                                                                                                                                                |
| EGF treatment<br>(case II) | $x_{i,t_1}^{\text{control}}, x_{i,t_2}^{\text{EGF}}$                | $x_{t_1,t_2,j}$<br>$x_{\ell_1,t_1}^{\text{control}}, x_{\ell_2,t_2}^{\text{EGF}}, x_{\ell_3,i}$<br>$1 \leq t_1, \ell_1 \leq T_{\text{control}}(=14), 1 \leq t_2, \ell_2 \leq T_{\text{EGF}}(=14), 1 \leq i, \ell_3 \leq 39937$ | $\tilde{x}_{t_1,t_2}$<br>$\tilde{x}_{\ell_1,t_1}^{\text{control}}, \tilde{x}_{\ell_2,t_2}^{\text{EGF}}, \tilde{x}_{\ell_3,i}^{\text{control}}, \tilde{x}_{\ell_3,i}^{\text{EGF}}$                                                                                                                                                                                                                              |
| Vaccination<br>(case II)   | $x_{i,t_1}^{\text{P}}, x_{i,t_2}^{\text{D}}, x_{i,t_3}^{\text{NP}}$ | —                                                                                                                                                                                                                              | $\tilde{x}_{t_1,t_2,t_3}$<br>$\tilde{x}_{\ell_1,t_1}^{\text{P}}, \tilde{x}_{\ell_2,t_2}^{\text{D}}, \tilde{x}_{\ell_3,t_3}^{\text{NP}}, \tilde{x}_{\ell_4,i}^{\text{P}}, \tilde{x}_{\ell_4,i}^{\text{D}}, \tilde{x}_{\ell_4,i}^{\text{NP}}$<br>$1 \leq t_1, \ell_1 \leq T_{\text{P}}(=58), 1 \leq t_2, \ell_2 \leq T_{\text{D}}(=52), 1 \leq t_3, \ell_3 \leq T_{\text{NP}}(=72), 1 \leq i, \ell_4 \leq 22277$ |
