# Supplementary material for: Tensor decomposition-based unsupervised feature extraction applied to matrix products for multi-view data processing
Source: PubMed Central journal article supplement (PMC5571984; doi:10.1371/journal.pone.0183933), 2017-08-25
Supplement: pone.0183933.s002.pdf [file pone.0183933.s002.pdf]

| term name                                                                | term ID    | n. of genes | corrected p-value | 1  | 2 | 3 | 4 | 5        |
|--------------------------------------------------------------------------|------------|-------------|-------------------|----|---|---|---|----------|
| Gene Ontology (Biological process)                                       |            |             |                   |    |   |   |   |          |
| BP TE tumor necrosis factor superfamily cytokine production              | GO:0071706 | 106         | 4.00e-02          |    |   |   |   | 5        |
| BP tumor necrosis factor production                                      | GO:0032640 | 101         | 3.16e-02          |    |   |   |   | 5        |
| BP regulation of tumor necrosis factor superfamily cytokine production   | GO:1903555 | 103         | 3.48e-02          |    |   |   |   | 5        |
| BP regulation of tumor necrosis factor production                        | GO:0032680 | 100         | 3.01e-02          |    |   |   |   | 5        |
| BP response to gamma radiation                                           | GO:0010332 | 50          | 2.34e-02          |    | 4 |   |   |          |
| BP positive regulation of cytosolic calcium ion concentration            | GO:0007204 | 265         | 3.52e-02          |    |   |   | 8 |          |
| BP TE apoptotic cell death                                               | GO:0012501 | 1812        | 2.06e-02          |    |   |   |   | 21       |
| BP apoptotic process                                                     | GO:0006915 | 1791        | 1.72e-02          |    |   |   |   | 21       |
| BP negative regulation of multicellular organism growth                  | GO:0040015 | 12          | 4.06e-02          |    |   |   |   | 3        |
| BP mammary gland development                                             | GO:0030879 | 136         | 5.67e-04          | 8  |   |   |   |          |
| BP phagocytosis, recognition                                             | GO:0006910 | 22          | 5.11e-03          |    |   |   |   | 4        |
| BP animal organ morphogenesis                                            | GO:0009887 | 990         | 3.02e-02          | 16 |   |   |   |          |
| BP sequestering of metal ion                                             | GO:0051238 | 127         | 3.79e-02          |    |   |   |   | 6        |
| BP mammary gland epithelial cell proliferation                           | GO:0033598 | 28          | 1.95e-02          | 4  |   |   |   |          |
| BP phagocytosis, engulfment                                              | GO:0006911 | 38          | 4.91e-02          |    |   |   |   | 4        |
| BP single-organism metabolic process                                     | GO:0044710 | 4155        | 4.38e-03          |    |   |   |   | 29       |
| BP homeostatic process                                                   | GO:0042592 | 1629        | 1.54e-02          |    |   |   |   | 20       |
| BP TE ion homeostasis                                                    | GO:0050801 | 716         | 1.64e-02          |    |   |   |   | 13       |
| BP inorganic ion homeostasis                                             | GO:0098771 | 654         | 6.11e-03          |    |   |   |   | 13       |
| BP cation homeostasis                                                    | GO:0055080 | 639         | 4.73e-03          |    |   |   |   | 13       |
| BP divalent inorganic cation homeostasis                                 | GO:0072507 | 431         | 4.61e-04          |    |   |   |   | 12       |
| BP metal ion homeostasis                                                 | GO:0055065 | 557         | 1.01e-03          |    |   |   |   | 13       |
| BP calcium ion homeostasis                                               | GO:0055074 | 399         | 1.39e-02          |    |   |   |   | 10       |
| BP cellular calcium homeostasis                                          | GO:0055082 | 721         | 1.77e-02          |    |   |   |   | 13       |
| BP cellular ion homeostasis                                              | GO:0006873 | 583         | 1.70e-03          |    |   |   |   | 13       |
| BP cellular cation homeostasis                                           | GO:0030003 | 568         | 1.26e-03          |    |   |   |   | 13       |
| BP cellular divalent inorganic cation homeostasis                        | GO:0072503 | 412         | 2.83e-04          |    |   |   |   | 12       |
| BP cellular metal ion homeostasis                                        | GO:0006875 | 489         | 2.27e-04          |    |   |   |   | 13       |
| BP cellular calcium ion homeostasis                                      | GO:0006874 | 387         | 1.06e-02          |    |   |   |   | 10       |
| BP TE tissue development                                                 | GO:0009888 | 1769        | 5.24e-03          |    |   |   |   | 17       |
| BP epithelium development                                                | GO:0060429 | 1072        | 9.39e-03          |    |   |   |   | 13       |
| BP tissue morphogenesis                                                  | GO:0048729 | 629         | 1.43e-02          |    |   |   |   | 10       |
| BP morphogenesis of an epithelium                                        | GO:0002009 | 528         | 2.55e-02          |    |   |   |   | 9        |
| BP TE immune system process                                              | GO:0002376 | 2387        | 1.35e-24          |    |   |   |   | 51 21    |
| BP immune effector process                                               | GO:0002252 | 713         | 1.35e-10          |    |   |   |   | 10 22    |
| BP leukocyte mediated immunity                                           | GO:0002443 | 332         | 2.80e-04          |    |   |   |   | 11       |
| BP lymphocyte mediated immunity                                          | GO:0002449 | 262         | 3.04e-04          |    |   |   |   | 10       |
| BP signaling                                                             | GO:0023052 | 6132        | 6.03e-07          |    |   |   |   | 52       |
| BP single organism signaling                                             | GO:0044700 | 6120        | 5.56e-07          |    |   |   |   | 52       |
| BP biological regulation                                                 | GO:0065007 | 11372       | 6.40e-03          |    |   |   |   | 65       |
| BP regulation of biological process                                      | GO:0050789 | 10756       | 6.19e-03          |    |   |   |   | 63       |
| BP positive regulation of biological process                             | GO:0048518 | 5194        | 3.52e-04          |    |   |   |   | 43       |
| BP positive regulation of signaling                                      | GO:0023056 | 1539        | 2.60e-02          |    |   |   |   | 19       |
| BP regulation of immune system process                                   | GO:0002684 | 1336        | 5.08e-13          |    |   |   |   | 14 31    |
| BP positive regulation of immune system process                          | GO:0002682 | 934         | 4.22e-11          |    |   |   |   | 31       |
| BP regulation of cellular process                                        | GO:0050794 | 10218       | 5.46e-04          |    |   |   |   | 63       |
| BP regulation of cell adhesion                                           | GO:0030155 | 621         | 2.10e-02          |    |   |   |   | 12       |
| BP response to stimulus                                                  | GO:0050896 | 8162        | 1.72e-13          |    |   |   |   | 68       |
| BP response to chemical                                                  | GO:0042221 | 4059        | 1.43e-04          |    |   |   |   | 38       |
| BP response to organic substance                                         | GO:0010033 | 2799        | 1.49e-06          |    |   |   |   | 34 23    |
| BP response to cytokine                                                  | GO:0034097 | 793         | 8.20e-14          |    |   |   |   | 26       |
| BP response to interleukin-1                                             | GO:0070555 | 114         | 2.04e-02          |    |   |   |   | 6        |
| BP response to tumor necrosis factor                                     | GO:0034612 | 276         | 4.25e-05          |    |   |   |   | 11       |
| BP response to lipid                                                     | GO:0033993 | 870         | 2.20e-02          |    |   |   |   | 12       |
| BP response to biotic stimulus                                           | GO:0009607 | 836         | 2.95e-13          |    |   |   |   | 26       |
| BP response to external stimulus                                         | GO:0009605 | 2021        | 6.24e-09          |    |   |   |   | 17 32 18 |
| BP response to external biotic stimulus                                  | GO:0043207 | 794         | 1.01e-12          |    |   |   |   | 25       |
| BP response to other organism                                            | GO:0051707 | 793         | 9.78e-13          |    |   |   |   | 23       |
| BP response to bacterium                                                 | GO:0009615 | 305         | 7.96e-13          |    |   |   |   | 13       |
| BP response to virus                                                     | GO:0009617 | 516         | 5.90e-07          |    |   |   |   | 15       |
| BP regulation of response to stimulus                                    | GO:0048583 | 3592        | 1.77e-05          |    |   |   |   | 37       |
| BP regulation of response to external stimulus                           | GO:0032101 | 703         | 2.29e-03          |    |   |   |   | 14 11    |
| BP response to stress                                                    | GO:0006950 | 3579        | 7.15e-09          |    |   |   |   | 23 42 28 |
| BP defense response                                                      | GO:0006952 | 1448        | 4.16e-19          |    |   |   |   | 14 38 22 |
| BP regulation of defense response                                        | GO:0031347 | 658         | 6.53e-03          |    |   |   |   | 13       |
| BP inflammatory response                                                 | GO:0006954 | 666         | 1.62e-06          |    |   |   |   | 12 15    |
| BP defense response to other organism                                    | GO:0098542 | 465         | 1.89e-14          |    |   |   |   | 22       |
| BP defense response to bacterium                                         | GO:0042742 | 239         | 9.52e-06          |    |   |   |   | 11       |
| BP defense response to virus                                             | GO:0051607 | 227         | 7.90e-05          |    |   |   |   | 10       |
| BP response to wounding                                                  | GO:0006911 | 644         | 4.95e-02          |    |   |   |   | 10       |
| BP immune response                                                       | GO:0009655 | 1530        | 9.36e-29          |    |   |   |   | 15 41    |
| BP humoral immune response                                               | GO:0006959 | 223         | 9.92e-03          |    |   |   |   | 8        |
| BP adaptive immune response                                              | GO:0002250 | 390         | 2.82e-12          |    |   |   |   | 19       |
| BP adaptive immune response based on somatic recombination of immune ... | GO:0002460 | 262         | 2.48e-05          |    |   |   |   | 11       |
| BP innate immune response                                                | GO:0045087 | 791         | 7.71e-14          |    |   |   |   | 26 12    |
| BP response to interferon-gamma                                          | GO:0034341 | 155         | 2.00e-06          |    |   |   |   | 10       |
| BP response to type I interferon                                         | GO:0034340 | 82          | 2.96e-03          |    |   |   |   | 6        |
| BP regulation of immune response                                         | GO:0050776 | 879         | 1.06e-07          |    |   |   |   | 24       |
| BP cellular response to stimulus                                         | GO:0051716 | 6818        | 5.64e-10          |    |   |   |   | 55       |
| BP cellular response to chemical stimulus                                | GO:0070887 | 2643        | 7.12e-06          | 29 |   |   |   | 32       |
| BP cellular response to organic substance                                | GO:0071310 | 2187        | 3.45e-05          |    |   |   |   | 28       |
| BP cellular response to cytokine stimulus                                | GO:0071345 | 697         | 6.16e-13          |    |   |   |   | 24       |
| BP cellular response to tumor necrosis factor                            | GO:0071356 | 258         | 2.64e-04          |    |   |   |   | 10       |
| BP cellular response to type I interferon                                | GO:0071357 | 78          | 2.20e-03          |    |   |   |   | 6        |
| BP cellular response to interferon-gamma                                 | GO:0071346 | 133         | 9.88e-06          |    |   |   |   | 9        |
| BP positive regulation of response to stimulus                           | GO:0048584 | 1994        | 4.33e-09          |    |   |   |   | 32       |
| BP positive regulation of response to external stimulus                  | GO:0032103 | 264         | 2.68e-05          |    |   |   |   | 11       |
| BP positive regulation of chemotaxis                                     | GO:0050921 | 118         | 2.48e-02          |    |   |   |   | 6        |
| BP positive regulation of defense response                               | GO:0031349 | 399         | 1.76e-03          |    |   |   |   | 11       |
| BP positive regulation of immune response                                | GO:0050778 | 664         | 3.71e-08          |    |   |   |   | 19       |
| BP activation of immune response                                         | GO:0002253 | 536         | 9.88e-06          |    |   |   |   | 15       |
| BP multicellular organismal process                                      | GO:0032501 | 6896        | 1.84e-02          |    |   |   |   | 37       |
| BP single-multicellular organism process                                 | GO:0044707 | 5900        | 1.00e-03          |    |   |   |   | 36       |
| BP regulation of multicellular organismal process                        | GO:0051239 | 2631        | 4.77e-04          |    |   |   |   | 29 21    |
| BP regulation of localization                                            | GO:0032879 | 2442        | 4.16e-02          |    |   |   |   | 20       |
| BP cell communication                                                    | GO:0007154 | 6147        | 6.66e-07          |    |   |   |   | 52       |
| BP signal transduction                                                   | GO:0007165 | 5674        | 1.17e-07          |    |   |   |   | 51       |
| BP cell surface receptor signaling pathway                               | GO:0007166 | 2661        | 3.93e-10          |    |   |   |   | 38       |
| BP cytokine-mediated signaling pathway                                   | GO:0019221 | 542         | 6.64e-12          |    |   |   |   | 21       |
| BP chemokine-mediated signaling pathway                                  | GO:0070098 | 80          | 2.56e-03          |    |   |   |   | 6        |
| BP type I interferon signaling pathway                                   | GO:0060337 | 78          | 2.20e-03          |    |   |   |   | 6        |
| BP interferon-gamma-mediated signaling pathway                           | GO:0060333 | 80          | 2.56e-03          |    |   |   |   | 6        |
| BP immune response-regulating signaling pathway                          | GO:0002764 | 513         | 4.84e-05          |    |   |   |   | 14       |
| BP immune response-regulating cell surface receptor signaling pathway    | GO:0002768 | 380         | 1.08e-03          |    |   |   |   | 14       |
| BP immune response-activating signal transduction                        | GO:0002757 | 482         | 2.20e-05          |    |   |   |   | 14       |
| BP immune response-activating cell surface receptor signaling pathway    | GO:0002429 | 350         | 4.77e-04          |    |   |   |   | 11       |
| BP antigen receptor-mediated signaling pathway                           | GO:0050851 | 209         | 2.32e-06          |    |   |   |   | 6 11     |
| BP B cell receptor signaling pathway                                     | GO:0050853 | 53          | 5.37e-06          |    |   |   |   | 7        |
| BP single organism cell adhesion                                         | GO:0098602 | 760         | 2.22e-05          |    |   |   |   | 17       |
| BP positive regulation of cellular process                               | GO:0048522 | 4635        | 4.86e-04          |    |   |   |   | 40       |
| BP positive regulation of cell communication                             | GO:0010647 | 1532        | 2.44e-02          |    |   |   |   | 19       |
| BP leukocyte proliferation                                               | GO:0070661 | 268         | 3.76e-04          |    |   |   |   | 10       |
| BP regulation of leukocyte proliferation                                 | GO:0070663 | 198         | 4.64e-02          |    |   |   |   | 7        |
| BP mononuclear cell proliferation                                        | GO:0032943 | 254         | 2.28e-04          |    |   |   |   | 10       |
| BP regulation of mononuclear cell proliferation                          | GO:0032944 | 190         | 3.55e-02          |    |   |   |   | 7        |
| BP cell-cell adhesion                                                    | GO:0098609 | 1145        | 7.58e-03          |    |   |   |   | 17       |
| BP single organismal cell-cell adhesion                                  | GO:0016337 | 708         | 5.72e-05          |    |   |   |   | 16       |
| BP leukocyte cell-cell adhesion                                          | GO:0007159 | 469         | 1.62e-06          |    |   |   |   | 15       |
| BP leukocyte aggregation                                                 | GO:0070486 | 436         | 5.80e-07          |    |   |   |   | 15       |
| BP lymphocyte aggregation                                                | GO:0071593 | 429         | 4.89e-05          |    |   |   |   | 13       |
| BP neutrophil aggregation                                                | GO:0070488 | 2           | 2.07e-02          |    |   |   |   | 2 2      |
| BP regulation of cell-cell adhesion                                      | GO:0022407 | 371         | 7.30e-03          |    |   |   |   | 10       |
| BP regulation of leukocyte cell-cell adhesion                            | GO:1903037 | 298         | 9.62e-03          |    |   |   |   | 9        |
| BP cell activation                                                       | GO:0001775 | 872         | 8.77e-12          |    |   |   |   | 25       |
| BP leukocyte activation                                                  | GO:0045321 | 709         | 1.08e-11          |    |   |   |   | 23       |
| BP myeloid leukocyte activation                                          | GO:0002274 | 155         | 9.31e-03          |    |   |   |   | 7        |
| BP myeloid dendritic cell activation                                     | GO:0001773 | 29          | 1.63e-02          |    |   |   |   | 4        |
| BP lymphocyte activation                                                 | GO:0046649 | 606         | 4.84e-12          |    |   |   |   | 22       |
| BP B cell activation                                                     | GO:0042113 | 228         | 5.81e-06          |    |   |   |   | 11       |
| BP lymphocyte proliferation                                              | GO:0046651 | 252         | 2.11e-04          |    |   |   |   | 10       |
| BP T cell aggregation                                                    | GO:0070489 | 428         | 4.76e-05          |    |   |   |   | 13       |
| BP T cell activation                                                     | GO:0042110 | 428         | 4.76e-05          |    |   |   |   | 13       |
| BP regulation of cell activation                                         | GO:0050865 | 470         | 1.56e-07          |    |   |   |   | 16       |
| BP regulation of leukocyte activation                                    | GO:0002694 | 436         | 5.09e-08          |    |   |   |   | 16       |
| BP regulation of lymphocyte activation                                   | GO:0051249 | 380         | 6.43e-09          |    |   |   |   | 16       |
| BP regulation of lymphocyte proliferation                                | GO:0050670 | 189         | 3.43e-02          |    |   |   |   | 7        |
| BP regulation of B cell activation                                       | GO:0050864 | 112         | 5.06e-05          |    |   |   |   | 6 8      |
| BP regulation of T cell activation                                       | GO:0050863 | 283         | 6.30e-03          |    |   |   |   | 9        |
| BP positive regulation of cell activation                                | GO:0050867 | 291         | 4.46e-07          |    |   |   |   | 13       |
| BP positive regulation of leukocyte activation                           | GO:0002696 | 282         | 3.02e-07          |    |   |   |   | 13       |
| BP positive regulation of lymphocyte activation                          | GO:0051251 | 258         | 1.53e-06          |    |   |   |   | 12       |
| BP positive regulation of B cell activation                              | GO:0050871 | 75          | 1.74e-03          |    |   |   |   | 6        |
| BP leukocyte migration                                                   | GO:0050900 | 370         | 8.75e-05          |    |   |   |   | 12       |
